# Supplementary material for: Evaluation of genetic isolation within an island flora reveals unusually widespread local adaptation and supports sympatric speciation
Source: PubMed Central journal article supplement (PMC4071517; doi:10.1098/rstb.2013.0342), 2014-08-05
Supplement: rstb20130342supp1.pdf [file rstb20130342supp1.pdf]

Electronic supplementary material (ESM)

ESM Appendix S1: Primer combinations used for AFLP selective amplification.

|                                 |                                  |                              |
|---------------------------------|----------------------------------|------------------------------|
| <i>Alyxia lindii</i>            | <i>Dracophyllum fitzgeraldii</i> | <i>Macropiper hooglandii</i> |
| EcoRI-ACT-FAM/MseI-CTC          | EcoRI-ACT-FAM/MseI-CAT           | EcoRI-ACT-FAM/MseI-CAT       |
| EcoRI-ACA-FAM/MseI-CTG          | EcoRI-AAG-JOE/MseI-CAC           | EcoRI-AGG-JOE/MseI-CAT       |
| EcoRI-AAG-JOE/MseI-CTT          | EcoRI-AAG-JOE/MseI-CTT           | EcoRI-AAG-JOE/MseI-CAT       |
| EcoRI-AAC-NED/MseI-CAA          | -                                | -                            |
| <i>Alyxia ruscifolia</i>        | <i>Geniostoma petiolosum</i>     | <i>Xylosma maidenii</i>      |
| EcoRI-ACT-FAM/MseI-CTC          | EcoRI-ACA-FAM/MseI-CTG           | EcoRI-ACT-FAM/MseI-CAT       |
| EcoRI-ACA-FAM/MseI-CTG          | EcoRI-AAG-JOE/MseI-CAC           | EcoRI-AGG-JOE/MseI-CAT       |
| EcoRI-AAG-JOE/MseI-CTT          | EcoRI-AAG-JOE/MseI-CTC           | EcoRI-AAG-JOE/MseI-CTT       |
| EcoRI-AAC-NED/MseI-CAA          | EcoRI-AAC-NED/MseI-CAA           | -                            |
| <i>Atractocarpus stipularis</i> | <i>Macropiper excelsum</i>       | <i>Zygogynum howeanum</i>    |
| EcoRI-ACT-FAM/MseI-CAC          | EcoRI-ACT-FAM/MseI-CAT           | EcoRI-ACT-FAM/MseI-CAT       |
| EcoRI-ACA-FAM/MseI-CTG          | EcoRI-AGG-JOE/MseI-CAT           | EcoRI-ACT-FAM/MseI-CAC       |
| EcoRI-AAG-JOE/MseI-CAC          | EcoRI-AGG-JOE/MseI-CTC           | EcoRI-AGG-JOE/MseI-CAT       |
| EcoRI-AAG-JOE/MseI-CTT          | -                                | -                            |

ESM Appendix S2. Evaluation of STRUCTURE results and choice of appropriate value of K.

| <i>Alyxia lindii</i> |                       |                         |            |
|----------------------|-----------------------|-------------------------|------------|
| K                    | Mean<br>Ln[Pr(X   K)] | St.dev<br>Ln[Pr(X   K)] | $\Delta K$ |
| 1                    | -1566.70              | 5.47                    | —          |
| 2                    | -1439.36              | 4.61                    | 28.30      |
| 3                    | -1442.54              | 11.95                   | 0.06       |
| 4                    | -1445.05              | 13.19                   | 0.69       |
| 5                    | -1456.71              | 9.68                    | 1.89       |
| 6                    | -1450.04              | 11.45                   | 1.47       |
| 7                    | -1460.20              | 15.20                   | 66.62      |
| 8                    | -2482.88              | 3208.95                 | —          |

| <i>Alyxia ruscifolia</i> |                       |                         |            |
|--------------------------|-----------------------|-------------------------|------------|
| K                        | Mean<br>Ln[Pr(X   K)] | St.dev<br>Ln[Pr(X   K)] | $\Delta K$ |
| 1                        | -1398.21              | 10.73                   | —          |
| 2                        | -1428.50              | 8.65                    | 2.21       |
| 3                        | -1477.93              | 43.92                   | 1.20       |
| 4                        | -1474.54              | 45.26                   | 1.22       |
| 5                        | -1416.02              | 59.03                   | 0.22       |
| 6                        | -1370.27              | 33.99                   | 3.05       |
| 7                        | -1428.24              | 167.40                  | 1.17       |
| 8                        | -1682.51              | 1091.19                 | —          |

| <i>Atractocarpus stipularis</i> |                       |                         |            |
|---------------------------------|-----------------------|-------------------------|------------|
| K                               | Mean<br>Ln[Pr(X   K)] | St.dev<br>Ln[Pr(X   K)] | $\Delta K$ |
| 1                               | -3511.79              | 6.06                    | —          |
| 2                               | -2881.79              | 7.02                    | 123.28     |
| 3                               | -3117.36              | 244.48                  | 0.44       |
| 4                               | -3460.79              | 280.23                  | 0.74       |
| 5                               | -4012.27              | 626.47                  | 1.21       |
| 6                               | -3805.95              | 500.47                  | 1.03       |
| 7                               | -4114.95              | 640.14                  | 0.81       |
| 8                               | -3904.01              | 203.31                  | —          |

| <i>Coprosma prisca</i> |                       |                         |            |
|------------------------|-----------------------|-------------------------|------------|
| K                      | Mean<br>Ln[Pr(X   K)] | St.dev<br>Ln[Pr(X   K)] | $\Delta K$ |
| 1                      | -2162.53              | 1.39                    | —          |
| 2                      | -1978.55              | 6.00                    | 13.32      |
| 3                      | -1874.50              | 10.94                   | 11.95      |
| 4                      | -1901.22              | 150.09                  | 5.35       |
| 5                      | -2731.27              | 1427.29                 | 1.10       |
| 6                      | -1996.37              | 441.14                  | 2.21       |
| 7                      | -2238.29              | 579.61                  | 0.79       |
| 8                      | -2024.62              | 214.48                  | —          |

| <i>Dracophyllum fitzgeraldii</i> |                       |                         |            |
|----------------------------------|-----------------------|-------------------------|------------|
| K                                | Mean<br>Ln[Pr(X   K)] | St.dev<br>Ln[Pr(X   K)] | $\Delta K$ |
| 1                                | -2512.32              | 5.96                    | —          |
| 2                                | -2297.79              | 6.15                    | 40.60      |
| 3                                | -2332.83              | 30.87                   | 12.17      |
| 4                                | -2743.69              | 358.23                  | 0.48       |
| 5                                | -3324.91              | 401.91                  | 0.50       |
| 6                                | -3703.80              | 1733.30                 | 0.45       |
| 7                                | -3309.17              | 201.96                  | 2.48       |
| 8                                | -3415.03              | 470.61                  | —          |

| <i>Geniostoma petiolosum</i> |                       |                         |            |
|------------------------------|-----------------------|-------------------------|------------|
| K                            | Mean<br>Ln[Pr(X   K)] | St.dev<br>Ln[Pr(X   K)] | $\Delta K$ |
| 1                            | -1511.70              | 7.02                    | —          |
| 2                            | -1350.68              | 12.76                   | 12.49      |
| 3                            | -1349.07              | 8.21                    | 0.38       |
| 4                            | -1344.32              | 9.45                    | 184.51     |
| 5                            | -3082.92              | 4641.15                 | 0.75       |
| 6                            | -1355.74              | 12.02                   | 144.90     |
| 7                            | -1370.34              | 10.62                   | 4.99       |
| 8                            | -1437.95              | 225.91                  | —          |

| <i>Macropiper excelsum and Macropiper hooglandii</i> |                       |                         |            |
|------------------------------------------------------|-----------------------|-------------------------|------------|
| K                                                    | Mean<br>Ln[Pr(X   K)] | St.dev<br>Ln[Pr(X   K)] | $\Delta K$ |
| 1                                                    | -2891.74              | 2.98                    | —          |
| 2                                                    | -1034.23              | 3.27                    | 534.94     |
| 3                                                    | -924.20               | 9.82                    | 10.48      |
| 4                                                    | -917.08               | 3.20                    | 3.76       |
| 5                                                    | -921.99               | 2.77                    | 1.05       |
| 6                                                    | -923.99               | 4.59                    | 0.05       |
| 7                                                    | -926.20               | 13.58                   | 0.53       |
| 8                                                    | -935.54               | 7.38                    | —          |

| <i>Xylosma maidenii</i> |                       |                         |            |
|-------------------------|-----------------------|-------------------------|------------|
| K                       | Mean<br>Ln[Pr(X   K)] | St.dev<br>Ln[Pr(X   K)] | $\Delta K$ |
| 1                       | -4655.07              | 7.41                    | —          |
| 2                       | -2532.87              | 5.28                    | 362.83     |
| 3                       | -2325.09              | 243.72                  | 0.42       |
| 4                       | -2220.08              | 19.49                   | 18.30      |
| 5                       | -2471.82              | 152.77                  | 1.37       |
| 6                       | -2514.86              | 79.47                   | 1.61       |
| 7                       | -2429.71              | 97.09                   | 1.04       |
| 8                       | -2445.20              | 80.62                   | —          |

| <i>Zygogynum howeanum</i> |                       |                         |            |
|---------------------------|-----------------------|-------------------------|------------|
| K                         | Mean<br>Ln[Pr(X   K)] | St.dev<br>Ln[Pr(X   K)] | $\Delta K$ |
| 1                         | -8322.03              | 59.21                   | —          |
| 2                         | -7739.39              | 22.46                   | 17.70      |
| 3                         | -7554.23              | 19.60                   | 14.40      |
| 4                         | -7651.44              | 163.78                  | 19.61      |
| 5                         | -10960.45             | 5544.87                 | 0.25       |
| 6                         | -12863.73             | 3340.08                 | 0.37       |
| 7                         | -16000.59             | 5582.10                 | 0.95       |
| 8                         | -13847.06             | 6813.09                 | —          |
